# Supplementary material
Source: Springer Nature journal article supplement (https://www.springermedizin.de/resource/supplementary/12885_2012_3775_MOESM6_ESM.pdf/9464424)

**A**

H&amp;E

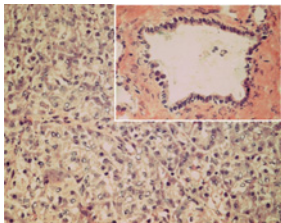**B**Integrin  $\alpha 1$ Integrin  $\alpha 2$ Integrin  $\beta 1$ 

Type IV collagen

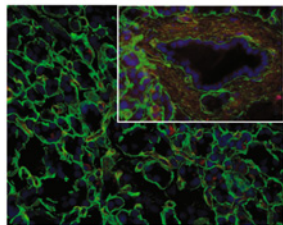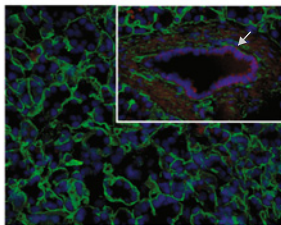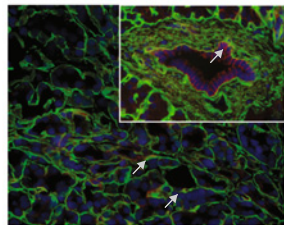

CD31

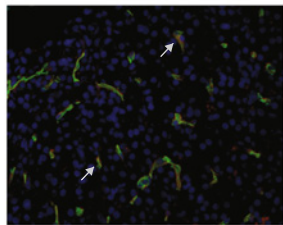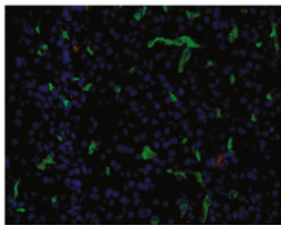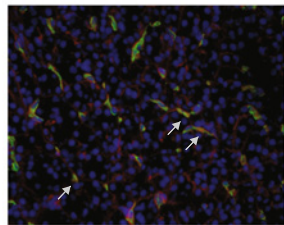

Supplement: MOESM6 [file 9464424]
